# Supplementary material for: Prevalence of pathogenic germline variants detected by multigene sequencing in unselected Japanese patients with ovarian cancer
Source: PubMed Central journal article supplement (PMC5762508; doi:10.18632/oncotarget.22733), 2017-11-28
Supplement: oncotarget-08-112258-s001.pdf [file oncotarget-08-112258-s001.pdf]

## Prevalence of pathogenic germline variants detected by multigene sequencing in unselected Japanese patients with ovarian cancer

### SUPPLEMENTARY MATERIALS

**Supplementary Table 1: List of 79 genes analyzed by targeted resequencing**

|               |               |                |               |                |               |                |                |                |
|---------------|---------------|----------------|---------------|----------------|---------------|----------------|----------------|----------------|
| <i>AKT1</i>   | <i>BRIP1</i>  | <i>CSMD3</i>   | <i>FANCL*</i> | <i>IGF2R</i>   | <i>MRE11A</i> | <i>PALB2</i>   | <i>PTEN</i>    | <i>SMAD4</i>   |
| <i>APC</i>    | <i>CBLC</i>   | <i>CTNNB1</i>  | <i>FAT3</i>   | <i>KIT</i>     | <i>MSH2</i>   | <i>PDGFRA</i>  | <i>RAD50</i>   | <i>SMARCA4</i> |
| <i>ARID1A</i> | <i>CCNE1</i>  | <i>CUBN</i>    | <i>FGFR1</i>  | <i>KRAS</i>    | <i>MSH3</i>   | <i>PIK3CA</i>  | <i>RAD51B*</i> | <i>STK11</i>   |
| <i>ATM</i>    | <i>CDH1</i>   | <i>EGFR</i>    | <i>FGFR2</i>  | <i>KREMEN1</i> | <i>MSH6</i>   | <i>PIKR1</i>   | <i>RAD51C</i>  | <i>TGFBR2</i>  |
| <i>BARD1</i>  | <i>CDK12</i>  | <i>EMSY*</i>   | <i>GABRA6</i> | <i>MAS1L</i>   | <i>MUTYH</i>  | <i>PMS2</i>    | <i>RAD51D</i>  | <i>TP53</i>    |
| <i>BMP1A</i>  | <i>CDK4</i>   | <i>EPCAM</i>   | <i>GNAS</i>   | <i>MLH1</i>    | <i>MYC</i>    | <i>POLD1</i>   | <i>RAD54L*</i> | <i>USP16</i>   |
| <i>BRAF</i>   | <i>CDKN2A</i> | <i>ERBB2</i>   | <i>GREM1</i>  | <i>MLH3</i>    | <i>NBN</i>    | <i>POLE</i>    | <i>RBI</i>     | <i>XRCC2</i>   |
| <i>BRCA1</i>  | <i>CHEK1</i>  | <i>FAM175A</i> | <i>HNF1A</i>  | <i>MLL2</i>    | <i>NF1</i>    | <i>PPM1D</i>   | <i>RECQL</i>   |                |
| <i>BRCA2</i>  | <i>CHEK2</i>  | <i>FANCC</i>   | <i>HNF1B</i>  | <i>MLL3</i>    | <i>NRAS</i>   | <i>PPP2R1A</i> | <i>SMAD2</i>   |                |

\*Genes (4) excluded from analysis in 44 samples.

**Supplementary Table 2: Correlation between pathogenic germline variants and family histories**

| Family history with first- or second-degree relatives | Pathogenic germline variants in any tested gene |                        |                          |                   |                |
|-------------------------------------------------------|-------------------------------------------------|------------------------|--------------------------|-------------------|----------------|
|                                                       | <i>BRCA1/2</i>                                  | MMR genes <sup>a</sup> | Other genes <sup>b</sup> | Any gene positive | All negative   |
| HBOC-related cancers <sup>c</sup>                     | 8/22 (36.4%)                                    | 1/3 (33.3%)            | 3/6 (50%)                | 12/31 (38.7%)     | 44/149 (29.5%) |
| Lynch syndrome-related cancers <sup>d</sup>           | 10/22 (45.5%)                                   | 0/3 (0%)               | 4/6 (66.7%)              | 14/31 (45.2%)     | 63/149 (49.0%) |

<sup>a</sup>*MLH1*, *MSH2*, *MSH6*, and *PMS2*.

<sup>b</sup>*RAD51D*, *ATM*, *MRE11A*, *FANCC*, and *GABRA*.

<sup>c</sup>HBOC (hereditary breast and ovarian cancer)-related cancers included breast, ovarian, pancreatic, and prostate cancers.

<sup>d</sup>Lynch syndrome-related cancers included colorectal, endometrial, gastric, ovarian, pancreatic, ureter, renal pelvis, biliary tract, brain duct, brain, and small intestinal cancers, as well as sebaceous gland adenomas and keratoacanthomas.

**Supplementary Table 3: Multivariate analysis to determine predictive clinicopathological factors of pathogenic germline variants of *BRCA1/2* or any tested genes in 230 patients with OC<sup>a</sup>**

| Variable                              | Pathogenic <i>BRCA1/2</i> variant |                     |                                      | Pathogenic variant in any tested gene |                     |                                      |
|---------------------------------------|-----------------------------------|---------------------|--------------------------------------|---------------------------------------|---------------------|--------------------------------------|
|                                       | Odds ratio                        | 95% CI <sup>b</sup> | Adjusted <i>P</i> value <sup>c</sup> | Odds ratio                            | 95% CI <sup>b</sup> | Adjusted <i>P</i> value <sup>c</sup> |
| Personal history of breast cancer     |                                   |                     |                                      |                                       |                     |                                      |
| Present vs. absent                    | 11.80                             | 1.43–96.90          | <b>0.0219</b>                        | 11.7                                  | 1.91–72.00          | <b>0.0079</b>                        |
| Histologic subtype of OC <sup>d</sup> |                                   |                     |                                      |                                       |                     |                                      |
| HGSC vs non-HGSC                      | 15.70                             | 5.17–47.70          | <b>&lt;0.0001</b>                    | 10.60                                 | 4.69–24.00          | <b>&lt;0.0001</b>                    |

<sup>a</sup>Multiple logistic regression with stepwise variable selection using *P*-values as selection criteria was performed with all variables in Table 3, except for family history.

<sup>b</sup>CI, confidence interval.

<sup>c</sup>Bold face text denotes statistically significant results.

<sup>d</sup>HGSC, high-grade serous carcinoma.
